# Supplementary material for: Trapping Brown Marmorated Stink Bugs: “The Nazgȗl” Lure and Kill Nets
Source: PubMed Central journal article supplement (PMC6955730; doi:10.3390/insects10120433), 2019-11-30
Supplement: insects-10-00433-s001.pdf [file insects-10-00433-s001.pdf]

**Supplementary Materials**

**Table S1.** Analysis of variance of log-transformed counts of *Halyomorpha halys* using three sampling systems in a hedge row at Fondazione Edmund Mach, Rovereto Farm (Experiment 2).

| Effects               | DF  | Adj SS | Adj MS | F-Value | p-Value |
|-----------------------|-----|--------|--------|---------|---------|
| Trap                  | 1   | 22.71  | 22.71  | 56.7    | <0.001  |
| Method (beating/trap) | 1   | 57.86  | 57.86  | 144.6   | <0.001  |
| Run                   | 1   | 6.62   | 6.62   | 16.5    | <0.001  |
| Traps*Method          | 1   | 0.44   | 1.1    | 1.1     | 0.295   |
| Traps*Run             | 1   | 5.29   | 5.29   | 13.2    | <0.001  |
| Method*Run            | 1   | 2.79   | 2.79   | 7.0     | 0.009   |
| Traps*Method*Run      | 1   | 0.24   | 0.24   | 0.6     | 0.441   |
| Error                 | 232 | 92.85  | 0.40   |         |         |

**Table S2.** Main effects table for the ANOVA on log-transformed adjusted adult counts of *Halyomorpha halys* in Experiment 3.

| Source      | DF  | Adj SS | Adj MS | F-Value | p-Value |
|-------------|-----|--------|--------|---------|---------|
| Site        | 2   | 1.874  | 0.9368 | 4.66    | 0.011   |
| Treatment   | 1   | 1.820  | 1.8205 | 9.06    | 0.003   |
| Date        | 2   | 2.955  | 1.4777 | 7.35    | 0.001   |
| Error       | 106 | 21.305 | 0.2010 |         |         |
| Lack-of-Fit | 12  | 5.711  | 0.4759 | 2.87    | 0.002   |
| Pure Error  | 94  | 15.594 | 0.1659 |         |         |
| Total       | 111 | 27.083 |        |         |         |

**Table S3.** Main effects table for the ANOVA on trap type with log-transformed adjusted adult counts of *Halyomorpha halys* in Experiment 4.

| Source | DF | Adj SS | Adj MS  | F-Value | p-Value |
|--------|----|--------|---------|---------|---------|
| Trap   | 1  | 0.6075 | 0.60755 | 10.37   | 0.005   |
| Error  | 16 | 0.9377 | 0.05861 |         |         |
| Total  | 17 | 1.5453 |         |         |         |
